# Supplementary material
Source: MDPI journal article supplement (https://www.mdpi.com/2673-9917/1/3/22)
Supplement: s1 [file s1]

**Table S1.** Mass fractions (ppm) of studied elements in mussel soft tissues and shells among stations.

| Elements | St. 1  |         | St. 2  |          | St. 3  |         |
|----------|--------|---------|--------|----------|--------|---------|
|          | Soft   | Shells  | Soft   | Shells   | Soft   | Shells  |
| Na       | 5800   | 3300    | 5800   | 2910     | 2480   | 2850    |
| Mg       | 2010   | 890     | 1890   | 1050     | 1360   | 1070    |
| Al       | 193    | 9.3     | 221    | 7.1      | 61     | 8.9     |
| S        | 1200   | BDL     | 1100   | BDL      | 910    | BDL     |
| Cl       | 5700   | 164     | 6000   | 149      | 2290   | 221     |
| K        | 1050   | BDL     | 1230   | BDL      | 960    | BDL     |
| Ca       | 7000   | 380,000 | 7800   | 400,000  | 5200   | 380,000 |
| Sc       | 0.168  | 0.0214  | 0.13   | 0.0078   | 0.092  | 0.0207  |
| Ti       | 23     | BDL     | 48     | BDL      | 19     | BDL     |
| V        | 2.22   | 0.18    | 0.86   | 0.063    | 0.57   | 0.11    |
| Cr       | 1.2    | 1.1     | 1.6    | 1.3      | 1.2    | 1.6     |
| Mn       | 8.6    | 2.86    | 9.8    | 3.4      | 6.9    | 6       |
| Fe       | 348    | 61      | 341    | 29       | 169    | 58      |
| Co       | 1.29   | 0.055   | 1.03   | 0.051    | 0.54   | 0.069   |
| Ni       | 2.4    | 0.38    | 2.9    | 0.27     | 2      | 0.31    |
| Cu       | 9      | BDL     | 7.7    | BDL      | 8.05   | BDL     |
| Zn       | 372    | 2.01    | 490    | 2.19     | 359    | 2.14    |
| As       | 20.7   | 0.23    | 14.5   | 0.21     | 14.1   | 0.16    |
| Se       | 2.55   | 0.054   | 1.64   | 0.058    | 1.66   | 0.06    |
| Br       | 219    | 79      | 251    | 67       | 144    | 58.6    |
| Rb       | 0.9    | 0.13    | 0.85   | 0.098    | 0.45   | 0.18    |
| Sr       | 62     | 1000    | 62     | 1020     | 47     | 990     |
| Sb       | 0.03   | 0.012   | 0.03   | 0.005    | 0.0205 | 0.013   |
| I        | 11.9   | 6.3     | 18.2   | 5.2      | 7.5    | 6.5     |
| Cs       | 0.038  | 0.0262  | 0.038  | 0.0103   | 0.0229 | 0.0302  |
| Ba       | 91     | 25      | 18     | 12.7     | 17     | 13.6    |
| La       | 0.4    | BDL     | 0.3    | BDL      | 0.16   | BDL     |
| Tb       | 0.0104 | 0.0019  | 0.0072 | 0.001195 | 0.0043 | 0.0028  |
| Ta       | 0.0052 | BDL     | 0.0034 | BDL      | 0.002  | BDL     |
| Au       | 0.016  | BDL     | 0.012  | BDL      | 0.01   | BDL     |
| Th       | 0.088  | 0.029   | 0.088  | 0.01     | 0.055  | 0.02    |
| U        | 0.34   | BDL     | 0.23   | BDL      | 0.15   | BDL     |

BDL—below detectable limits.

**Table S2.** Enrichment factors for soft tissues of mussels among studied stations

|    | St. 1  | St. 2  | St. 3  |
|----|--------|--------|--------|
| Na | 46.8   | 60.4   | 36.5   |
| Mg | 10.4   | 12.6   | 12.8   |
| Al | 0.2    | 0.3    | 0.1    |
| Cl | 2450.4 | 3333.3 | 1797.7 |
| K  | 3.1    | 4.6    | 5.1    |
| Ca | 33.9   | 48.8   | 45.9   |
| Sc | 1.0    | 1.0    | 1.0    |
| Ti | 0.4    | 1.0    | 0.6    |
| V  | 1.3    | 0.7    | 0.6    |
| Cr | 1.0    | 1.8    | 1.9    |
| Mn | 0.8    | 1.2    | 1.1    |
| Fe | 0.6    | 0.7    | 0.5    |
| Co | 5.3    | 5.4    | 4.0    |
| Ni | 2.7    | 4.3    | 4.2    |
| Zn | 303.0  | 515.8  | 534.0  |
| As | 123.2  | 111.5  | 153.3  |
| Se | 328.9  | 273.3  | 390.9  |
| Br | 847.3  | 1255   | 1017.4 |
| Rb | 0.5    | 0.6    | 0.5    |
| Sr | 16.0   | 20.7   | 22.1   |
| Sb | 1.5    | 2.0    | 1.9    |
| I  | 48.5   | 95.8   | 55.8   |
| Cs | 0.6    | 0.8    | 0.6    |
| Ba | 12.1   | 3.1    | 4.1    |
| La | 1.0    | 0.9    | 0.7    |
| Tb | 0.9    | 0.8    | 0.7    |
| Ta | 0.5    | 0.4    | 0.4    |
| Th | 0.6    | 0.7    | 0.6    |
| U  | 7.1    | 6.2    | 5.7    |
